# Supplementary material
Source: ML conference proceedings conference paper supplement (https://proceedings.mlr.press/v84/yu18a.html)
Supplement: Supplementary file [file yu18a-supp.pdf]

## A Supplementary: On the Equivalence of Tensor Regression and Gaussian Process

### A.1 Eigenvalue problem

Let  $\mathbf{K} = \tilde{\mathbf{U}}\tilde{\mathbf{U}}^\top$ , take derivative over  $\tilde{\mathbf{U}}$ , we obtain the stationary point condition:  $\mathbf{y}\mathbf{y}^\top(\mathbf{K} + \mathbf{D})^{-1}\tilde{\mathbf{U}} = \tilde{\mathbf{U}}$ , Given the decomposition of  $\tilde{\mathbf{U}} = \mathbf{U}_x \boldsymbol{\Sigma}_x \mathbf{V}_x^\top$ , similar to (Lawrence, 2004), we have

$$\begin{aligned} \mathbf{y}\mathbf{y}^\top(\mathbf{K} + \mathbf{D})^{-1}\tilde{\mathbf{U}} &= \tilde{\mathbf{U}} \\ \mathbf{y}\mathbf{y}^\top(\mathbf{K} + \mathbf{D})^{-1}\mathbf{U}_x \boldsymbol{\Sigma}_x \mathbf{V}_x^\top &= \mathbf{U}_x \boldsymbol{\Sigma}_x \mathbf{V}_x^\top \\ \mathbf{y}\mathbf{y}^\top \mathbf{U}_x (\boldsymbol{\Sigma}_x + \mathbf{D}\boldsymbol{\Sigma}_x^{-1})^{-1} \mathbf{V}_x^\top &= \mathbf{U}_x \boldsymbol{\Sigma}_x \mathbf{V}_x^\top \\ \mathbf{y}\mathbf{y}^\top \mathbf{U}_x &= \mathbf{U}_x (\boldsymbol{\Sigma}_x^2 + \mathbf{D}) \end{aligned}$$

which is a eigenvalue problem in the transformed space.

### A.2 Derivatives for the Optimization

Given that  $\mathbf{y} \sim N(\mathbf{0}, \mathbf{K} + \mathbf{D})$ , where  $\mathbf{K} = \phi(\mathbf{X}) \otimes_{m=1}^M \mathbf{K}_m \phi(\mathbf{X})^\top$ .

Decompose  $\mathbf{K}_m = \mathbf{U}_m \mathbf{U}_m^\top$ , we have  $\mathbf{K} = \phi(\mathbf{X}) (\otimes_{m=1}^M \mathbf{U}_m) (\otimes_{m=1}^M \mathbf{U}_m^\top) \phi(\mathbf{X})^\top$ .

Let  $\tilde{\mathbf{U}} = \phi(\mathbf{X}) (\otimes_{m=1}^M \mathbf{U}_m)$ , we have  $\mathbf{K} = \tilde{\mathbf{U}}\tilde{\mathbf{U}}^\top$

The negative log-likelihood

$$L = \frac{1}{2} \mathbf{y}^\top (\tilde{\mathbf{U}}\tilde{\mathbf{U}}^\top + \mathbf{D})^{-1} \mathbf{y} + \frac{1}{2} \log \det(\tilde{\mathbf{U}}\tilde{\mathbf{U}}^\top + \mathbf{D}) + \text{const}$$

Based on Woodbury lemma,  $(\tilde{\mathbf{U}}\tilde{\mathbf{U}}^\top + \mathbf{D})^{-1} = \mathbf{D}^{-1} - \mathbf{D}^{-1}\tilde{\mathbf{U}}(\mathbf{D} + \tilde{\mathbf{U}}^\top\tilde{\mathbf{U}})^{-1}\tilde{\mathbf{U}}^\top$  as well as matrix determinant lemma  $\det(\tilde{\mathbf{U}}\tilde{\mathbf{U}}^\top + \mathbf{D}) = \det(\mathbf{I} + \tilde{\mathbf{U}}^\top\mathbf{D}^{-1}\tilde{\mathbf{U}}) \det(\mathbf{D}) = \det(\mathbf{D} + \tilde{\mathbf{U}}^\top\tilde{\mathbf{U}})$

Denote  $\boldsymbol{\Sigma} = \mathbf{D} + \tilde{\mathbf{U}}^\top\tilde{\mathbf{U}}$ , let  $\mathbf{w} = \boldsymbol{\Sigma}^{-1}\tilde{\mathbf{U}}^\top\mathbf{y}$ . The objective function can be rewrite as

$$L = \frac{1}{2} \mathbf{D}^{-1} \mathbf{y}^\top \mathbf{y} - \frac{1}{2} \mathbf{D}^{-1} \mathbf{y}^\top \tilde{\mathbf{U}} \boldsymbol{\Sigma}^{-1} \tilde{\mathbf{U}}^\top \mathbf{y} + \frac{1}{2} \log \det(\boldsymbol{\Sigma}) + \text{const}$$

Take derivative over  $\mathbf{U}_{m(i,j)}$ , we have

$$\frac{\partial L}{\partial \mathbf{U}_{m(i,j)}} = \text{tr} \left[ \left( \frac{\partial L}{\partial \tilde{\mathbf{U}}} \right)^\top \left( \frac{\partial \tilde{\mathbf{U}}}{\partial \mathbf{U}_{m(i,j)}} \right) \right], \quad \frac{\partial L}{\partial \tilde{\mathbf{U}}} = \tilde{\mathbf{U}} (\boldsymbol{\Sigma}^{-1} + \mathbf{w} \mathbf{D}^{-1} \mathbf{w}^\top)^{-1} - \mathbf{y} \mathbf{D}^{-1} \mathbf{w}^\top$$

$$\frac{\partial \tilde{\mathbf{U}}}{\partial \mathbf{U}_{m(i,j)}} = \frac{\partial \phi(\mathbf{X})}{\partial \mathbf{U}_{m(i,j)}} (\mathbf{U}_M \otimes \cdots \otimes \frac{\partial \mathbf{U}_m}{\partial \mathbf{U}_{m(i,j)}} \cdots \otimes \mathbf{U}_1) = \frac{\partial \phi(\mathbf{X})}{\partial \mathbf{U}_{m(i,j)}} (\mathbf{U}_M \otimes \cdots \otimes \mathbf{O}_{m(i,j)} \cdots \otimes \mathbf{U}_1)$$

Here  $\mathbf{O}_{m(i,j)} = \mathbf{e}_i \mathbf{e}_j^\top$  is a matrix with all zeros, but the  $(i, j)$ th entry as one.

The predictive distribution:  $p(y_\star | \mathbf{x}_\star, \mathbf{X}, \mathbf{y}) \sim N(\mu_\star, \sigma_\star)$ :

$$\begin{aligned} \mu_\star &= \mathbf{k}(\mathbf{x}_\star, \mathbf{X}) (\mathbf{D}^{-1} - \mathbf{D}^{-1} \tilde{\mathbf{U}} (\mathbf{D} + \tilde{\mathbf{U}}^\top \tilde{\mathbf{U}})^{-1} \tilde{\mathbf{U}}^\top) \mathbf{y} \\ \sigma_\star &= \mathbf{k}(\mathbf{x}_\star, \mathbf{x}_\star) - \mathbf{k}(\mathbf{x}_\star, \mathbf{X}) (\mathbf{D}^{-1} - \mathbf{D}^{-1} \tilde{\mathbf{U}} (\mathbf{D} + \tilde{\mathbf{U}}^\top \tilde{\mathbf{U}})^{-1} \tilde{\mathbf{U}}^\top) \mathbf{k}(\mathbf{X}, \mathbf{x}_\star) \end{aligned}$$

Where  $\tilde{\mathbf{U}} = \phi(\mathbf{X}) (\otimes_{m=1}^M \mathbf{U}_m)$ .

### A.3 Proof for Proposition 2.1

Consider a 3-mode  $T_1 \times T_2 \times T_3$  tensor  $\mathcal{W}$  of functions  $\mathcal{W}_{(1)} = [\mathbf{w}_1(\mathbf{X}), \cdots, \mathbf{w}_T(\mathbf{X})]$

$$\mathcal{W} = \mathcal{S} \times_1 \mathbf{U}_1(\mathcal{X}) \times_2 \mathbf{U}_2 \times_3 \mathbf{U}_3$$

where  $\mathbf{U}_m$  is an orthogonal  $T_m \times R_m$  matrix. Assuming  $\mathbf{U}_1(\mathcal{X})$  satisfies  $\mathbb{E}[\mathbf{U}_1^\top \mathbf{U}_1] = \mathbf{I}$  (orthogonal design after rotation).

With Tucker property

$$\mathcal{W}_{(1)} = \mathbf{U}_1(\mathcal{X})\mathcal{S}_{(1)}(\mathbf{U}_2\mathbf{U}_3)^\top$$

The population risk can be written as

$$\mathcal{L}(\mathcal{W}) = \text{tr}\left\{(\mathcal{Y} - \langle \mathcal{X}, \mathcal{W} \rangle)(\mathcal{Y} - \langle \mathcal{X}, \mathcal{W} \rangle)^\top\right\} = \text{tr}\left\{\left(\begin{array}{c} -2\mathbf{I} \\ -\mathcal{S}_{(1)}(\mathbf{U}_2\mathbf{U}_3)^\top \end{array}\right)^\top \mathbb{E}[\text{cov}(\mathcal{Y}, \mathbf{U}_1(\mathcal{X}))] \left(\begin{array}{c} \mathbf{0} \\ -\mathcal{S}_{(1)}(\mathbf{U}_2\mathbf{U}_3)^\top \end{array}\right) + \mathbb{E}(\mathcal{Y}\mathcal{Y}^\top)\right\}$$

Denote  $\mathbb{E}[\text{cov}(\mathcal{Y}, \mathbf{U}_1(\mathcal{X}))] = \boldsymbol{\Sigma}(\mathbf{U}_1)$ , bound the difference

$$\begin{aligned} \mathcal{L}(\mathcal{W}) - \hat{\mathcal{L}}(\mathcal{W}) &= \text{tr}\left\{\left(\begin{array}{c} -2\mathbf{I} \\ \mathcal{S}_{(1)}(\mathbf{U}_2\mathbf{U}_3)^\top \end{array}\right) (\boldsymbol{\Sigma}(\mathbf{U}_1) - \hat{\boldsymbol{\Sigma}}(\mathbf{U}_1)) \left(\begin{array}{c} \mathbf{0} \\ \mathcal{S}_{(1)}(\mathbf{U}_2\mathbf{U}_3)^\top \end{array}\right)\right\} \\ &\leq \left\|\left(\begin{array}{c} -2\mathbf{I} \\ \mathcal{S}_{(1)}(\mathbf{U}_2\mathbf{U}_3)^\top \end{array}\right) (\boldsymbol{\Sigma}(\mathbf{U}_1) - \hat{\boldsymbol{\Sigma}}(\mathbf{U}_1))\right\|_2 \left\|\left(\begin{array}{c} \mathbf{0} \\ \mathcal{S}_{(1)}(\mathbf{U}_2\mathbf{U}_3)^\top \end{array}\right)\right\|_* \\ &\leq C \max\{2, \|\mathcal{S}_{(1)}\|_*^2\} \|\boldsymbol{\Sigma}(\mathbf{U}_1) - \hat{\boldsymbol{\Sigma}}(\mathbf{U}_1)\|_2 \end{aligned}$$

With  $C$  as a universal constant. The inequality holds with Schatten norm Hölder's inequality

$$\|AB\|_{S_1} \leq \|A\|_{S_p} \|B\|_{S_q} \quad 1/p + 1/q = 1$$

Given that  $\sup_{\mathbf{U}_1} \|\boldsymbol{\Sigma}(\mathbf{U}_1) - \hat{\boldsymbol{\Sigma}}(\mathbf{U}_1)\|_2 = \mathcal{O}_P\left(\sqrt{\frac{T_2 T_3 + \log(T_1 T_2 T_3)}{N}}\right)$

Denote empirical risk  $\hat{\mathcal{L}} = \sum_{t=1}^T \sum_{i=1}^{n_t} \mathcal{L}(\langle \mathbf{w}_t, \mathbf{x}_{t,i} \rangle)$ . Let  $\mathcal{W}^* = \inf_{\mathcal{W} \in \mathcal{C}} \mathcal{L}(\mathcal{W})$ . The excess risk

$$\begin{aligned} \mathcal{L}(\hat{\mathcal{W}}) - \mathcal{L}(\mathcal{W}^*) &= \mathcal{L}(\hat{\mathcal{W}}) - \hat{\mathcal{L}}(\hat{\mathcal{W}}) + (\hat{\mathcal{L}}(\hat{\mathcal{W}}) - \hat{\mathcal{L}}(\mathcal{W}^*)) + (\hat{\mathcal{L}}(\mathcal{W}^*) - \mathcal{L}(\mathcal{W}^*)) \\ &\leq [\mathcal{L}(\hat{\mathcal{W}}) - \hat{\mathcal{L}}(\hat{\mathcal{W}})] - [\mathcal{L}(\mathcal{W}^*) - \hat{\mathcal{L}}(\mathcal{W}^*)] \\ &\leq 2 \sup_{\mathcal{W} \in \mathcal{C}_N} \{\mathcal{L}(\mathcal{W}) - \hat{\mathcal{L}}(\mathcal{W})\} \\ &\leq \mathcal{O}\left(\|\mathcal{S}_{(1)}\|_*^2 \|\boldsymbol{\Sigma}(\mathbf{U}_1) - \hat{\boldsymbol{\Sigma}}(\mathbf{U}_1)\|_2\right) \end{aligned}$$

if we assume  $\|\mathcal{S}_{(1)}\|_*^2 = \mathcal{O}\left(\left(\frac{N}{T_2 T_3 + \log(T_1 T_2 T_3)}\right)^{1/4}\right)$ , then  $\mathcal{L}(\hat{\mathcal{W}}) - \mathcal{L}(\mathcal{W}^*) \leq \mathcal{O}(1)$ , thus we obtain the oracle inequality as stated.

#### A.4 Proof of Theorem 2.2

We can extend the approach of single task Gaussian process (Sollich and Halees, 2002) to our setting. We provide the derivation for the full-rank case, but similar results apply to low-rank case as well. The Bayes error for the full-rank covariance model is:

$$\hat{\epsilon} = \text{tr}(\boldsymbol{\Lambda}'^{-1} + \boldsymbol{\Psi}^\top \mathbf{D}^{-1} \boldsymbol{\Psi})^{-1}$$

To obtain learning curve  $\epsilon = \mathbb{E}_{\mathcal{D}}[\hat{\epsilon}]$ , it is useful to see how the matrix  $\mathcal{G} = (\boldsymbol{\Lambda}^{-1} + \boldsymbol{\Psi}^\top \mathbf{D}^{-1} \boldsymbol{\Psi})^{-1}$  changes with sample size.  $\boldsymbol{\Psi}^\top \boldsymbol{\Psi}$  can be interpreted as the input correlation matrix.

To account for the fluctuations of the element in  $\boldsymbol{\Psi}^\top \boldsymbol{\Psi}$ , we introduce auxiliary offset parameters  $\{v_t\}$  into the definition of  $\mathcal{G}$ . Define resolvent matrix

$$\mathcal{G}^{-1} = \boldsymbol{\Lambda}^{-1} + \boldsymbol{\Psi}^\top \mathbf{D}^{-1} \boldsymbol{\Psi} + \sum_t v_t \mathbf{P}_t$$

where  $\mathbf{P}_t$  is short for  $\mathbf{P}_{t_1, \dots, t_M}$ , which defines the projection of  $t$ th task to its multi-directional indexes.

Evaluating the change

$$\mathcal{G}(n+1) - \mathcal{G}(n) = [\mathcal{G}^{-1}(n) + \sigma_t^{-2} \psi_t \psi_t^\top]^{-1} - \mathcal{G}(n) = \frac{\mathcal{G}(n) \psi_t \psi_t^\top \mathcal{G}(n)}{\sigma_t^2 + \psi_t^\top \mathcal{G}(n) \psi_t}$$

where element  $(\psi_t)_i = \delta_{\tau_{n+1},t} \phi_{it}(x_{n+1})$  and  $\tau$  maps the global sample index to task-specific sample index. Introducing  $\mathbf{G} = \mathbb{E}_{\mathcal{D}}[\mathcal{G}]$  and take expectation over numerator and denominator separately, we have

$$\frac{\partial \mathbf{G}}{\partial n_t} = -\frac{\mathbb{E}_{\mathcal{D}}[\mathcal{G} \mathbf{P}_t \mathcal{G}]}{\sigma_t^2 + \text{tr} \mathbf{P}_t \mathbf{G}}$$

Since generalization error  $\epsilon_t = \text{tr} \mathbf{P}_t \mathbf{G}$ , we have that  $-\mathbb{E}_{\mathcal{D}}[\mathcal{G} \mathbf{P}_t \mathcal{G}] = \frac{\partial}{\partial v_t} \mathbb{E}_{\mathcal{D}}[\mathcal{G}] = \frac{\partial \mathbf{G}}{\partial v_t}$ . Multiplying  $\mathbf{P}_s$  on both sides yields the approximation for the expected change:

$$\frac{\partial \mathbf{P}_s \mathbf{G}}{\partial n_t} = \frac{\partial \epsilon_s}{\partial n_t} = \frac{1}{\sigma_t^2 + \epsilon_t} \frac{\partial \epsilon_s}{\partial v_t}$$

Solving  $\epsilon_t(N, v)$  using the methods of characteristic curves and resetting  $v$  to zero, gives the self-consistency equations:

$$\epsilon_t(N) = \text{tr} \mathbf{P}_t \left( \mathbf{\Lambda}'^{-1} + \sum_s \frac{n_s}{\sigma_s^2 + \epsilon_s} \right)^{-1}$$
